# Supplementary material for: Cell Profiling of Acute Kidney Injury to Chronic Kidney Disease Reveals Novel Oxidative Stress Characteristics in the Failed Repair of Proximal Tubule Cells
Source: MDPI journal article supplement (doi:10.3390/ijms241411617), 2023-07-18
Supplement: s1 [file s1]

| Genes in different clusters in BEAM analysis |         |
|----------------------------------------------|---------|
| Gene                                         | Cluster |
| Sdc4                                         | 1       |
| Adgrg2                                       | 2       |
| Selenop                                      | 1       |
| Ifrd1                                        | 2       |
| Ccdc141                                      | 1       |
| Tgfbr3                                       | 2       |
| Dbi                                          | 2       |
| Hivep1                                       | 2       |
| Itgb6                                        | 2       |
| Mpc2                                         | 1       |
| Gtdc1                                        | 2       |
| Galnt18                                      | 1       |
| Nfkbiz                                       | 2       |
| Ppm1l                                        | 1       |
| Prickle2                                     | 2       |
| Tnrc18                                       | 1       |
| Hnf1b                                        | 1       |
| Col4a2                                       | 2       |
| BC005537                                     | 3       |
| Limch1                                       | 1       |
| Adgrl2                                       | 2       |
| Kcnh8                                        | 2       |
| P4ha1                                        | 1       |
| Tln2                                         | 1       |
| Parp14                                       | 2       |
| Atp6v1e1                                     | 1       |
| Pdlim5                                       | 2       |
| Ypel2                                        | 2       |
| Ankrd12                                      | 2       |
| Arhgap6                                      | 1       |
| Zbtb16                                       | 2       |
| Chka                                         | 2       |
| Large1                                       | 2       |
| Gpc3                                         | 2       |
| Sash1                                        | 2       |
| Etv6                                         | 2       |
| Tcf4                                         | 2       |
| Ivns1abp                                     | 1       |
| Dstn                                         | 2       |
| Adamts9                                      | 2       |
| Pdia3                                        | 3       |

|          |   |
|----------|---|
| Trpm7    | 1 |
| Kcnc2    | 2 |
| Hook3    | 3 |
| Osbpl3   | 2 |
| Tnfaip3  | 2 |
| Peli2    | 1 |
| Rims2    | 2 |
| Ppp4r4   | 2 |
| Stxbp6   | 2 |
| Neat1    | 2 |
| lpmk     | 1 |
| Gsap     | 2 |
| Adam10   | 2 |
| Nckap5   | 2 |
| Clic4    | 2 |
| Atp13a3  | 2 |
| Erbin    | 3 |
| Pfkfb3   | 2 |
| Abtb2    | 2 |
| Ctsl     | 2 |
| Eda      | 2 |
| Phldb2   | 1 |
| Ccdc148  | 2 |
| Sh3d19   | 2 |
| Sgms2    | 2 |
| Zfp704   | 2 |
| Dach1    | 2 |
| Tle4     | 1 |
| Aff1     | 3 |
| Oxct1    | 1 |
| Ankrd44  | 2 |
| Smad7    | 3 |
| Shroom4  | 1 |
| B4galt5  | 2 |
| Myo5b    | 2 |
| Atp5a1   | 3 |
| Fras1    | 1 |
| Kansl1   | 1 |
| Hnf1aos1 | 2 |
| Rnf180   | 2 |
| Ube2e2   | 2 |
| Slc30a5  | 1 |
| Shank2   | 1 |

|               |   |
|---------------|---|
| Pclo          | 1 |
| Pax8          | 2 |
| Slc6a18       | 1 |
| Arhgap26      | 2 |
| 2210408l21Rik | 1 |
| Prdx1         | 3 |
| Mid1          | 2 |
| Pkp4          | 1 |
| Rnf128        | 3 |
| Airn          | 2 |
| Commd10       | 1 |
| 2610307P16Rik | 2 |
| Cgnl1         | 3 |
| Cobl          | 2 |
| Fam107b       | 1 |
| Me3           | 1 |
| Gcc2          | 3 |
| Cox7c         | 3 |
| Iqgap2        | 1 |
| Gcnt2         | 2 |
| Wdr72         | 1 |
| Arid5b        | 2 |
| Rdh10         | 2 |
| Mpp6          | 2 |
| Zfp36l1       | 2 |
| Dock8         | 3 |
| Gm4876        | 2 |
| Abca1         | 2 |
| Apbb2         | 1 |
| Stat1         | 1 |
| Fermt1        | 2 |
| Pth1r         | 3 |
| Ctsb          | 3 |
| Prrg4         | 2 |
| Ank3          | 1 |
| Myo9a         | 2 |
| Glis3         | 2 |
| Cdk8          | 1 |
| Wee1          | 2 |
| Nrg1          | 2 |
| Cobll1        | 1 |
| Kif5b         | 3 |
| Col4a1        | 2 |

|               |   |
|---------------|---|
| Tbc1d1        | 2 |
| Sptan1        | 1 |
| Etnk1         | 3 |
| Cd63          | 3 |
| Pard3b        | 2 |
| Resf1         | 2 |
| Tmcc3         | 2 |
| Itga6         | 2 |
| Pde4b         | 2 |
| Sema6a        | 2 |
| Ldlrad4       | 2 |
| Npnt          | 2 |
| Eil2          | 1 |
| Sema3c        | 2 |
| Car2          | 1 |
| Plau          | 2 |
| Cdkal1        | 1 |
| Ngf           | 2 |
| Hivep2        | 2 |
| Jun           | 2 |
| Atp5b         | 3 |
| Grip1         | 2 |
| Mrpl33        | 2 |
| C3            | 2 |
| Trpm3         | 2 |
| Setbp1        | 2 |
| H3f3b         | 2 |
| Map3k1        | 2 |
| Veph1         | 2 |
| Pik3c2a       | 2 |
| Vmp1          | 2 |
| Atp1b1        | 1 |
| Slc12a2       | 3 |
| 5730522E02Rik | 1 |
| Gab2          | 3 |
| Picalm        | 2 |
| Rbpms         | 2 |
| Prrg1         | 2 |
| Trio          | 2 |
| Nhs12         | 2 |
| Pbx1          | 1 |
| Hs2st1        | 3 |
| Cxcl2         | 2 |

|            |   |
|------------|---|
| Mdm2       | 3 |
| Dapk1      | 3 |
| Exoc4      | 3 |
| Rbbp6      | 3 |
| Agps       | 2 |
| Eif2s2     | 3 |
| Ext1       | 1 |
| Psap       | 3 |
| Tpr        | 3 |
| Mast4      | 2 |
| Slc25a30   | 1 |
| Ptpn22     | 2 |
| Camkmt     | 3 |
| Enah       | 2 |
| Birc3      | 2 |
| Gpx3       | 1 |
| Bod1l      | 3 |
| Cfap69     | 1 |
| Csgalnact1 | 1 |
| Foxo3      | 1 |
| Vgll4      | 1 |
| Crim1      | 2 |
| H2-K1      | 2 |
| Rnf213     | 3 |
| Lin52      | 1 |
| Sdc2       | 1 |
| Cltrn      | 1 |
| Mlt3       | 3 |
| Arhgap29   | 3 |
| Znrf1      | 2 |
| Cdh1       | 3 |
| Itga1      | 2 |
| Lpp        | 2 |
| Ldhd       | 2 |
| Shroom3    | 3 |
| Slc22a23   | 1 |
| Hspa5      | 3 |
| Wsb1       | 3 |
| Slco3a1    | 2 |
| Birc2      | 2 |
| Fhod3      | 2 |
| Gclm       | 3 |
| Atp1a1     | 1 |

|          |   |
|----------|---|
| Eif1     | 3 |
| Cftr     | 2 |
| Adamts1  | 2 |
| Pabpc1   | 3 |
| Dock4    | 1 |
| St8sia6  | 2 |
| Wwox     | 2 |
| Acsl4    | 2 |
| Plod2    | 2 |
| Arhgap10 | 1 |
| Pitpnc1  | 1 |
| Pcdh7    | 1 |
| Slc43a2  | 1 |
| Rassf6   | 2 |
| Nedd4l   | 1 |
| Camk2d   | 3 |
| Nfkb1    | 2 |
| Hmgcs1   | 1 |
| Meis2    | 3 |
| Frk      | 2 |
| Jarid2   | 1 |
| Malt1    | 2 |
| Vcl      | 2 |
| Fat1     | 3 |
| Cxcl1    | 2 |
| Suz12    | 3 |
| Zbtb38   | 3 |
| Grk5     | 2 |
| Gm15261  | 2 |
| Ror1     | 2 |
| Gls      | 3 |
| Nudt4    | 3 |
| Kcnma1   | 3 |
| Fgf1     | 1 |
| Hsp90b1  | 3 |
| Ly6a     | 3 |
| Plcl1    | 1 |
| Mfhas1   | 2 |
| Srrm1    | 3 |
| Hmgb1    | 3 |
| Kap      | 1 |
| Gse1     | 3 |
| Smarca2  | 1 |

|               |   |
|---------------|---|
| Ly6e          | 2 |
| Chn2          | 1 |
| Txnip         | 3 |
| 9530026P05Rik | 2 |
| Ncl           | 3 |
| Rpl5          | 3 |
| Cmip          | 1 |
| Zeb1          | 2 |
| Nr3c2         | 3 |
| Son           | 3 |
| Itpr2         | 1 |
| Slf1          | 3 |
| Jazf1         | 2 |
| Glul          | 1 |
| Zfp697        | 1 |
| Ppargc1a      | 1 |
| Ybx1          | 3 |
| Egfr          | 2 |
| Fam129a       | 2 |
| Rock2         | 3 |
| mt-Nd3        | 3 |
| Acyp2         | 1 |
| Hspa8         | 3 |
| Gxylt2        | 2 |
| 3-Mar         | 1 |
| Tgfbr1        | 3 |
| Phactr2       | 2 |
| Chd4          | 3 |
| Fth1          | 3 |
| Lgmn          | 1 |
| Tet2          | 1 |
| Rpl17         | 3 |
| Fam13b        | 2 |
| Mme           | 3 |
| Abcc4         | 3 |
| Schip1        | 3 |
| Pakap.1       | 2 |
| Bcl2          | 3 |
| Gm32461       | 2 |
| Nrp1          | 3 |
| Wwc1          | 3 |
| Nfib          | 3 |
| Cd9           | 2 |

|               |   |
|---------------|---|
| Sema5a        | 2 |
| Il34          | 2 |
| Rpl27a        | 3 |
| 1600010M07Rik | 2 |
| Rras2         | 3 |
| Fam13a        | 1 |
| Uap1          | 2 |
| Gmds          | 2 |
| Cdh2          | 3 |
| Ankrd33b      | 2 |
| Prom1         | 2 |
| Mapk4         | 2 |
| Plscr1        | 2 |
| Magi1         | 3 |
| Fau           | 3 |
| St3gal3       | 2 |
| Dysf          | 3 |
| Agbl4         | 1 |
| Arl15         | 2 |
| Pvt1          | 3 |
| Slc7a8        | 1 |
| Spns2         | 3 |
| Syne2         | 3 |
| Rbbp8         | 2 |
| Ppia          | 3 |
| Nt5e          | 2 |
| Akt3          | 2 |
| Tsc22d1       | 3 |
| Paqr5         | 3 |
| Chst11        | 1 |
| Carmil1       | 3 |
| Gm13415       | 2 |
| Rpl23         | 3 |
| Atp2a2        | 1 |
| Prkag2        | 1 |
| Arhgap24      | 1 |
| Mylk          | 2 |
| Smad3         | 3 |
| Ptbp3         | 2 |
| Phip          | 3 |
| Eml4          | 3 |
| Krt20         | 2 |
| Tanc1         | 3 |



|          |   |
|----------|---|
| Rps12    | 3 |
| Baz1b    | 3 |
| Raph1    | 2 |
| Palld    | 2 |
| Ankrd6   | 2 |
| Glud1    | 1 |
| Vcam1    | 2 |
| Srrm2    | 3 |
| Cdk6     | 2 |
| Rps2     | 3 |
| Lgr4     | 1 |
| Rpl10a   | 3 |
| Plac8    | 2 |
| Rbms1    | 3 |
| Ctsd     | 3 |
| Arsb     | 1 |
| Npm1     | 3 |
| Ugt8a    | 1 |
| Zeb2     | 2 |
| Parp8    | 2 |
| Ppp2r3a  | 1 |
| Sh3rf1   | 2 |
| Cpe      | 2 |
| Mcc      | 2 |
| Ptprj    | 2 |
| Cep112   | 3 |
| Itgb1    | 2 |
| Rpl13    | 3 |
| Ranbp17  | 3 |
| Rpl6     | 3 |
| Gm13684  | 2 |
| Gm42031  | 3 |
| Tenm3    | 2 |
| Fndc3b   | 3 |
| Kl       | 1 |
| Ntn1     | 2 |
| Arhgap22 | 2 |
| Dleu2    | 2 |
| Sat1     | 2 |
| Egfrs    | 2 |
| Pkhd1    | 2 |
| Nt5c2    | 1 |
| Esr1     | 2 |

|               |   |
|---------------|---|
| Slc6a15       | 2 |
| Kansl1l       | 2 |
| Arhgap15      | 1 |
| Msn           | 3 |
| Asap1         | 2 |
| Dnm3          | 3 |
| Tfcp2l1       | 1 |
| Dtnb          | 3 |
| Rps20         | 3 |
| Cadps2        | 2 |
| Vav3          | 3 |
| Mertk         | 1 |
| Ptpn13        | 2 |
| Ppp2r5e       | 1 |
| Tbc1d4        | 3 |
| Ccdc88a       | 3 |
| Clstn2        | 3 |
| Arhgef3       | 2 |
| Hsp90ab1      | 3 |
| Ccser1        | 3 |
| Prkca         | 3 |
| Itgav         | 2 |
| Gclc          | 3 |
| Hacl1         | 1 |
| Rbm47         | 1 |
| Nuak2         | 1 |
| Cd2ap         | 2 |
| Plch1         | 3 |
| Slc6a6        | 1 |
| 1700025G04Rik | 2 |
| Met           | 3 |
| Thsd7a        | 2 |
| Tns3          | 2 |
| Col4a4        | 1 |
| Mir99ahg      | 1 |
| Col18a1       | 2 |
| Rps24         | 3 |
| Pbx3          | 3 |
| Bicc1         | 2 |
| Mat2a         | 1 |
| Gm16685       | 2 |
| Ckap5         | 3 |
| Chsy3         | 2 |

|          |   |
|----------|---|
| Slc16a10 | 1 |
| Igfbp7   | 2 |
| Erc2     | 1 |
| mt-Nd4l  | 3 |
| Rps8     | 3 |
| Pank1    | 1 |
| Rplp1    | 3 |
| Nbea     | 3 |
| Fhl1     | 1 |
| Stard13  | 3 |
| Gm12353  | 2 |
| MacroD2  | 1 |
| Actg1    | 3 |
| Umod     | 3 |
| Plcb4    | 3 |
| Ftl1     | 3 |
| Fxyd2    | 3 |
| Kcnk5    | 1 |
| Phyhipl  | 1 |
| Peak1    | 3 |
| Oxr1     | 3 |
| Fkbp5    | 1 |
| Scin     | 2 |
| Wnk1     | 3 |
| Hoxb6    | 3 |
| Agmo     | 1 |
| Tpt1     | 3 |
| Sord     | 1 |
| Hecw2    | 2 |
| Lncpint  | 1 |
| Pdgfd    | 2 |
| Map3k7cl | 1 |
| Specc1   | 2 |
| Gm20275  | 2 |
| Cadm1    | 3 |
| Rpl41    | 3 |
| Dcdc2a   | 2 |
| Hnf4g    | 1 |
| Map3k5   | 1 |
| Alcam    | 3 |
| Tead1    | 3 |
| Ptma     | 3 |
| Actb     | 3 |

|          |   |
|----------|---|
| Cep85    | 2 |
| Ezh2     | 3 |
| 1-Mar    | 2 |
| Cyp4b1   | 1 |
| Creb5    | 2 |
| Atrx     | 3 |
| Dst      | 3 |
| Tmem178b | 1 |
| Gatm     | 1 |
| Iqgap1   | 3 |
| Kctd1    | 3 |
| Gphn     | 1 |
| Nfat5    | 2 |
| Igsf11   | 1 |
| Stk39    | 3 |
| Gabrb3   | 1 |
| Aoah     | 1 |
| Plppr1   | 2 |
| Gas2     | 1 |
| Cttnbp2  | 2 |
| Ncoa7    | 1 |
| Anxa2    | 2 |
| Nkain2   | 3 |
| Maml3    | 3 |
| Gm47283  | 3 |
| Lrrfip1  | 3 |
| Tnfaip8  | 1 |
| Syn3     | 2 |
| Pik3c2g  | 1 |
| Map1b    | 2 |
| Bcas3    | 1 |
| Acot12   | 1 |
| Eef1a1   | 3 |
| Npas3    | 1 |
| Phactr1  | 3 |
| Slc16a12 | 1 |
| Abcc2    | 1 |
| Atxn1    | 1 |
| Epb41    | 1 |
| Rad51b   | 3 |
| Tpm1     | 2 |
| P3h2     | 1 |
| Grid1    | 2 |

|          |   |
|----------|---|
| Sugct    | 1 |
| Ptpm     | 3 |
| Bmp6     | 2 |
| Car12    | 1 |
| Nsd2     | 3 |
| Angpt1   | 1 |
| Pawr     | 1 |
| Samd4    | 2 |
| Sorcs1   | 2 |
| mt-Cytb  | 3 |
| S100a6   | 3 |
| Fmn1     | 3 |
| Col4a3   | 1 |
| Sycp3    | 2 |
| Ppp1r16b | 1 |
| Pde1a    | 1 |
| Plcb1    | 1 |
| Gcnt1    | 1 |
| Slc17a3  | 1 |
| Etl4     | 2 |
| Slc5a2   | 1 |
| Gria3    | 1 |
| Ptpn14   | 3 |
| mt-Nd1   | 3 |
| Rtn4     | 2 |
| Anxa3    | 2 |
| Cldn10   | 1 |
| Immp2l   | 2 |
| Sult1d1  | 1 |
| mt-Nd5   | 3 |
| Igf1r    | 1 |
| Fam214a  | 1 |
| Alpl     | 1 |
| Slc1a1   | 1 |
| mt-Nd2   | 3 |
| Cpeb3    | 1 |
| Tinag    | 1 |
| Tns1     | 1 |
| Slc2a2   | 2 |
| Tacc2    | 1 |
| Rora     | 2 |
| Ncam1    | 3 |
| Dock10   | 2 |

|          |   |
|----------|---|
| Cep128   | 3 |
| Slc7a7   | 1 |
| Nav2     | 3 |
| Gm36388  | 2 |
| Unc5c    | 1 |
| Syt12    | 2 |
| Lpin2    | 1 |
| Slc8a1   | 3 |
| Adamts6  | 1 |
| Slc12a3  | 3 |
| Pdzrn3   | 1 |
| Slit2    | 3 |
| Gpc4     | 1 |
| Pcsk5    | 2 |
| Gm14764  | 1 |
| Maml2    | 3 |
| Lactb2   | 1 |
| Clu      | 3 |
| Srgap1   | 3 |
| Ugt2b38  | 1 |
| Myh9     | 2 |
| Cpeb4    | 1 |
| Thrb     | 1 |
| Plat     | 2 |
| mt-Nd4   | 3 |
| Itgb8    | 2 |
| Adra1a   | 1 |
| Slc16a9  | 1 |
| Aspa     | 1 |
| Maf      | 1 |
| Slc22a30 | 1 |
| Plxdc2   | 1 |
| Enpp2    | 1 |
| Nfia     | 1 |
| Hgd      | 1 |
| Stox2    | 3 |
| Cubn     | 1 |
| Pah      | 1 |
| Ahnak    | 3 |
| Atp11a   | 2 |
| Slc18a1  | 1 |
| Sorbs2   | 3 |
| Fyb2     | 2 |

|          |   |
|----------|---|
| Gm45792  | 1 |
| Aass     | 1 |
| Fmnl2    | 3 |
| Osbpl6   | 1 |
| Slc25a21 | 1 |
| Naaladl2 | 3 |
| Slc22a28 | 1 |
| Tshz2    | 3 |
| Pdzd2    | 1 |
| Actn1    | 2 |
| Pola1    | 3 |
| Sdk1     | 3 |
| Msra     | 1 |
| Rgl1     | 1 |
| Cald1    | 3 |
| Lars2    | 3 |
| Rbms3    | 3 |
| Trps1    | 1 |
| Myof     | 2 |
| mt-Atp6  | 3 |
| Glis1    | 1 |
| Pdzk1    | 1 |
| Cdh13    | 3 |
| Cp       | 2 |
| Hsd3b2   | 1 |
| Prkn     | 1 |
| Ar       | 1 |
| Slc16a14 | 1 |
| Cryl1    | 1 |
| mt-Co3   | 3 |
| Ntm      | 3 |
| Timp3    | 2 |
| Runx1    | 3 |
| Epb41l3  | 1 |
| Il7      | 2 |
| Mki67    | 3 |
| Trabd2b  | 1 |
| Spp1     | 2 |
| Frmd4b   | 1 |
| Gpc6     | 3 |
| Psd3     | 2 |
| Fgfr2    | 2 |
| Rhobtb1  | 2 |

|          |   |
|----------|---|
| Kcnj16   | 2 |
| Aldob    | 1 |
| Atp6v0a4 | 1 |
| Slc12a1  | 3 |
| Folh1    | 1 |
| Gm42397  | 1 |
| mt-Co2   | 3 |
| Gramd1b  | 1 |
| Tanc2    | 1 |
| Slc17a1  | 1 |
| Gm37245  | 2 |
| Gldc     | 1 |
| Wdr17    | 2 |
| Utrn     | 3 |
| Galnt14  | 1 |
| Cd44     | 2 |
| Erb4     | 3 |
| Gm20528  | 2 |
| Esrrg    | 2 |
| Camk1d   | 3 |
| Pter     | 2 |
| Lrp2     | 1 |
| Them7    | 1 |
| Slc5a12  | 1 |
| Slc27a2  | 1 |
| Snhg11   | 1 |
| Hnf4a    | 1 |
| Pck1     | 1 |
| Mecom    | 3 |
| Dpyd     | 2 |
| Fut9     | 1 |
| Ptprd    | 1 |
| Bnc2     | 1 |
| Fggy     | 2 |
| Cyp2j13  | 1 |
| Cyp2j5   | 1 |
| Errfi1   | 1 |
| Magi2    | 2 |
| Kcnip4   | 2 |
| Ugt2b37  | 2 |
| Slc4a4   | 1 |
| Auts2    | 1 |
| Slc13a1  | 2 |



|         |   |
|---------|---|
| Itpr1   | 1 |
| Slco1a6 | 1 |
| Nox4    | 1 |
| Acsn2   | 1 |
| Acsn1   | 1 |
| Gm19950 | 1 |
| Akap12  | 2 |
| Chpt1   | 1 |
| Nr1h4   | 1 |
| Osbpl8  | 2 |
| Havcr1  | 2 |
| Taco1   | 3 |
| Acox1   | 1 |
| Slc34a1 | 1 |
| Pde4d   | 1 |
| Fhit    | 2 |
| Lrmda   | 2 |
| Gm6999  | 1 |
| Diaph3  | 3 |
| Ghr     | 1 |
| Dab2    | 1 |
| Gm16311 | 1 |

Supplementary Table S1 Genes in different clusters in BEAM analysis of SnRNA



| DEGs in GSE161758 |          |            |       |       |           |         |          |
|-------------------|----------|------------|-------|-------|-----------|---------|----------|
|                   | p_val    | avg_log2FC | pct.1 | pct.2 | p_val_adj | cluster | gene     |
| Tmsb4x            | 6.64E-25 | 1.613161   | 0.496 | 0.234 | 5.76E-21  | atrophy | Tmsb4x   |
| Gm11808           | 1.27E-24 | 1.149863   | 0.501 | 0.255 | 1.10E-20  | atrophy | Gm11808  |
| Apoe              | 3.49E-21 | 1.246883   | 0.345 | 0.137 | 3.03E-17  | atrophy | Apoe     |
| Cyba              | 2.05E-19 | 0.85564    | 0.633 | 0.394 | 1.78E-15  | atrophy | Cyba     |
| Igfbp7            | 1.01E-15 | 0.752096   | 0.592 | 0.385 | 8.73E-12  | atrophy | Igfbp7   |
| Ugt2b38           | 4.94E-15 | 1.095967   | 0.474 | 0.284 | 4.28E-11  | atrophy | Ugt2b38  |
| Lpl               | 2.06E-14 | 1.217384   | 0.285 | 0.126 | 1.79E-10  | atrophy | Lpl      |
| Defb29            | 6.22E-14 | 0.854035   | 0.51  | 0.329 | 5.39E-10  | atrophy | Defb29   |
| Cd36              | 1.19E-13 | 1.193577   | 0.255 | 0.108 | 1.03E-09  | atrophy | Cd36     |
| Tmem176a          | 2.48E-13 | 0.946866   | 0.458 | 0.29  | 2.15E-09  | atrophy | Tmem176a |
| Tmem27            | 1.09E-12 | 0.732455   | 0.652 | 0.487 | 9.49E-09  | atrophy | Tmem27   |
| B2m               | 1.12E-12 | 1.009092   | 0.288 | 0.136 | 9.67E-09  | atrophy | B2m      |
| Cd63              | 6.98E-12 | 0.769585   | 0.529 | 0.35  | 6.05E-08  | atrophy | Cd63     |
| Tmbim4            | 1.32E-11 | 0.782129   | 0.405 | 0.242 | 1.14E-07  | atrophy | Tmbim4   |
| Cyp4b1            | 2.42E-11 | 0.907409   | 0.573 | 0.427 | 2.10E-07  | atrophy | Cyp4b1   |
| Ccdc107           | 3.32E-11 | 0.858919   | 0.37  | 0.211 | 2.87E-07  | atrophy | Ccdc107  |
| Arl6ip1           | 5.59E-11 | 0.767555   | 0.386 | 0.225 | 4.85E-07  | atrophy | Arl6ip1  |
| Lamp2             | 9.03E-11 | 0.723691   | 0.381 | 0.216 | 7.82E-07  | atrophy | Lamp2    |
| Bsg               | 3.44E-10 | 0.77416    | 0.323 | 0.177 | 2.98E-06  | atrophy | Bsg      |

|          |          |          |       |       |          |          |          |
|----------|----------|----------|-------|-------|----------|----------|----------|
| Slc27a2  | 4.01E-10 | 0.66804  | 0.567 | 0.426 | 3.48E-06 | atrop hy | Slc27a2  |
| Ugt2b37  | 9.91E-10 | 1.008104 | 0.255 | 0.129 | 8.59E-06 | atrop hy | Ugt2b37  |
| Kap      | 1.96E-09 | 0.812604 | 0.871 | 0.923 | 1.70E-05 | atrop hy | Kap      |
| Cyp2j5   | 2.13E-09 | 0.608238 | 0.422 | 0.269 | 1.84E-05 | atrop hy | Cyp2j5   |
| Actb     | 1.57E-08 | 0.649644 | 0.597 | 0.442 | 0.000136 | atrop hy | Actb     |
| Cox6a1   | 3.37E-08 | 0.356539 | 0.811 | 0.755 | 0.000292 | atrop hy | Cox6a1   |
| Napsa    | 5.13E-08 | 0.739863 | 0.373 | 0.242 | 0.000444 | atrop hy | Napsa    |
| Tmem176b | 5.44E-08 | 0.599625 | 0.466 | 0.332 | 0.000471 | atrop hy | Tmem176b |
| Spcs1    | 1.70E-07 | 0.673267 | 0.266 | 0.152 | 0.001472 | atrop hy | Spcs1    |
| Lrpap1   | 2.48E-07 | 0.684109 | 0.263 | 0.15  | 0.00215  | atrop hy | Lrpap1   |
| Pdzk1ip1 | 3.35E-07 | 0.660344 | 0.559 | 0.435 | 0.002902 | atrop hy | Pdzk1ip1 |
| Atp1b1   | 5.24E-07 | 0.449329 | 0.559 | 0.425 | 0.004542 | atrop hy | Atp1b1   |
| Nat8     | 7.33E-07 | 0.619163 | 0.326 | 0.209 | 0.00635  | atrop hy | Nat8     |
| Acsn2    | 1.31E-06 | 0.490562 | 0.677 | 0.585 | 0.011348 | atrop hy | Acsn2    |
| Psap     | 3.54E-06 | 0.496817 | 0.378 | 0.252 | 0.030674 | atrop hy | Psap     |
| Sod3     | 4.76E-06 | 0.557646 | 0.266 | 0.162 | 0.041287 | atrop hy | Sod3     |
| Cyp2e1   | 6.75E-06 | 0.707032 | 0.512 | 0.416 | 0.058533 | atrop hy | Cyp2e1   |
| Ldhd     | 1.07E-05 | 0.501815 | 0.562 | 0.466 | 0.092847 | atrop hy | Ldhd     |
| Timp3    | 1.60E-05 | 0.333641 | 0.471 | 0.333 | 0.13873  | atrop hy | Timp3    |
| Ces1f    | 5.42E-05 | 0.491346 | 0.37  | 0.266 | 0.469706 | atrop hy | Ces1f    |
| Folr1    | 6.26E-05 | 0.548554 | 0.367 | 0.261 | 0.542113 | atrop hy | Folr1    |
| Guca2b   | 0.000121 | 0.327894 | 0.649 | 0.586 | 1        | atrop hy | Guca2b   |

|          |          |          |       |       |          |         |          |
|----------|----------|----------|-------|-------|----------|---------|----------|
| Slc22a18 | 0.000188 | 0.426571 | 0.279 | 0.19  | 1        | atrophy | Slc22a18 |
| Atp1a1   | 0.000268 | 0.347985 | 0.452 | 0.345 | 1        | atrophy | Atp1a1   |
| Rps9     | 0.000302 | 0.312915 | 0.723 | 0.665 | 1        | atrophy | Rps9     |
| Smpdl3a  | 0.000592 | 0.561986 | 0.279 | 0.198 | 1        | atrophy | Smpdl3a  |
| Lamp1    | 0.001271 | 0.324236 | 0.405 | 0.332 | 1        | atrophy | Lamp1    |
| Ggt1     | 0.001528 | 0.453347 | 0.381 | 0.311 | 1        | atrophy | Ggt1     |
| Galnt11  | 0.001849 | 0.391672 | 0.337 | 0.256 | 1        | atrophy | Galnt11  |
| Hpn      | 0.002194 | 0.367734 | 0.258 | 0.183 | 1        | atrophy | Hpn      |
| Rps5     | 0.004116 | 0.283968 | 0.682 | 0.665 | 1        | atrophy | Rps5     |
| Hbb-bs   | 0.004913 | 0.585488 | 0.427 | 0.359 | 1        | atrophy | Hbb-bs   |
| G0s2     | 0.005778 | 0.586021 | 0.255 | 0.194 | 1        | atrophy | G0s2     |
| Pck1     | 2.48E-29 | 1.280063 | 0.765 | 0.507 | 2.15E-25 | repair  | Pck1     |
| Sat1     | 1.75E-13 | 0.681086 | 0.652 | 0.452 | 1.52E-09 | repair  | Sat1     |
| Bola3    | 4.42E-12 | 0.717431 | 0.542 | 0.351 | 3.83E-08 | repair  | Bola3    |
| Iscu     | 9.17E-12 | 0.647751 | 0.606 | 0.427 | 7.95E-08 | repair  | Iscu     |
| Pcbd1    | 1.14E-11 | 0.492953 | 0.71  | 0.507 | 9.89E-08 | repair  | Pcbd1    |
| Cda      | 6.05E-11 | 0.486054 | 0.717 | 0.578 | 5.25E-07 | repair  | Cda      |
| Cryl1    | 2.02E-10 | 0.625193 | 0.463 | 0.274 | 1.75E-06 | repair  | Cryl1    |
| Sdhc     | 3.35E-10 | 0.623974 | 0.528 | 0.332 | 2.90E-06 | repair  | Sdhc     |
| Ftl1     | 5.16E-10 | 0.351737 | 0.994 | 0.997 | 4.47E-06 | repair  | Ftl1     |
| Ak4      | 6.20E-10 | 0.926664 | 0.31  | 0.145 | 5.37E-06 | repair  | Ak4      |
| Idh1     | 8.84E-10 | 0.602014 | 0.556 | 0.373 | 7.66E-06 | repair  | Idh1     |

|             |          |          |       |       |          |          |             |
|-------------|----------|----------|-------|-------|----------|----------|-------------|
| Bnip3       | 2.49E-09 | 0.769194 | 0.305 | 0.148 | 2.16E-05 | repaired | Bnip3       |
| Fis1        | 2.61E-09 | 0.667793 | 0.436 | 0.255 | 2.26E-05 | repaired | Fis1        |
| Scp2        | 2.87E-09 | 0.342703 | 0.887 | 0.841 | 2.49E-05 | repaired | Scp2        |
| Cisd1       | 4.64E-09 | 0.48096  | 0.709 | 0.597 | 4.02E-05 | repaired | Cisd1       |
| Gstm1       | 8.96E-09 | 0.765366 | 0.545 | 0.395 | 7.77E-05 | repaired | Gstm1       |
| Akr1a1      | 9.22E-09 | 0.316896 | 0.944 | 0.901 | 7.99E-05 | repaired | Akr1a1      |
| Pxmp4       | 1.26E-08 | 0.805993 | 0.283 | 0.14  | 0.000109 | repaired | Pxmp4       |
| Gstt2       | 1.48E-08 | 0.598004 | 0.433 | 0.274 | 0.000128 | repaired | Gstt2       |
| Atp5e       | 4.66E-08 | 0.29115  | 0.911 | 0.855 | 0.000404 | repaired | Atp5e       |
| Dnajc19     | 7.34E-08 | 0.54587  | 0.536 | 0.373 | 0.000636 | repaired | Dnajc19     |
| Gsr         | 8.97E-08 | 0.652136 | 0.36  | 0.211 | 0.000777 | repaired | Gsr         |
| Fitm1       | 1.98E-07 | 0.701944 | 0.351 | 0.214 | 0.001718 | repaired | Fitm1       |
| RP24-64C6-3 | 2.39E-07 | 0.524485 | 0.591 | 0.447 | 0.002067 | repaired | RP24-64C6-3 |
| Atp6v1f     | 2.48E-07 | 0.502661 | 0.521 | 0.364 | 0.002152 | repaired | Atp6v1f     |
| Prdx1       | 2.73E-07 | 0.34061  | 0.93  | 0.904 | 0.002368 | repaired | Prdx1       |
| Uba52       | 2.94E-07 | 0.401713 | 0.769 | 0.693 | 0.002546 | repaired | Uba52       |
| Med28       | 5.32E-07 | 0.567645 | 0.381 | 0.241 | 0.004613 | repaired | Med28       |
| Serf2       | 7.38E-07 | 0.360822 | 0.804 | 0.699 | 0.006392 | repaired | Serf2       |
| Hibadh      | 9.21E-07 | 0.469641 | 0.549 | 0.414 | 0.007985 | repaired | Hibadh      |
| Lamtor2     | 1.12E-06 | 0.573747 | 0.4   | 0.258 | 0.009741 | repaired | Lamtor2     |
| Mif         | 1.39E-06 | 0.373231 | 0.732 | 0.622 | 0.012066 | repaired | Mif         |
| Slc25a5     | 1.79E-06 | 0.349314 | 0.747 | 0.677 | 0.015475 | repaired | Slc25a5     |

|               |          |          |       |       |          |        |               |
|---------------|----------|----------|-------|-------|----------|--------|---------------|
| Atp5c1        | 1.98E-06 | 0.356074 | 0.64  | 0.507 | 0.017185 | repair | Atp5c1        |
| Sult1d1       | 4.36E-06 | 0.402399 | 0.639 | 0.545 | 0.037802 | repair | Sult1d1       |
| Cox7b         | 5.08E-06 | 0.301881 | 0.757 | 0.644 | 0.044022 | repair | Cox7b         |
| D8Ert738e     | 5.77E-06 | 0.445008 | 0.454 | 0.318 | 0.050033 | repair | D8Ert738e     |
| Vps29         | 7.85E-06 | 0.556694 | 0.294 | 0.181 | 0.068071 | repair | Vps29         |
| Atp6v1e1      | 9.89E-06 | 0.343692 | 0.456 | 0.318 | 0.085676 | repair | Atp6v1e1      |
| Ascc1         | 1.03E-05 | 0.392587 | 0.475 | 0.345 | 0.08936  | repair | Ascc1         |
| S100a1        | 1.15E-05 | 0.395252 | 0.54  | 0.405 | 0.09955  | repair | S100a1        |
| Glul          | 1.32E-05 | 0.539473 | 0.35  | 0.23  | 0.114715 | repair | Glul          |
| Gabarapl2     | 2.03E-05 | 0.437307 | 0.337 | 0.216 | 0.175793 | repair | Gabarapl2     |
| Mtch2         | 2.15E-05 | 0.513397 | 0.293 | 0.181 | 0.186254 | repair | Mtch2         |
| Gnas          | 2.93E-05 | 0.369635 | 0.42  | 0.293 | 0.253742 | repair | Gnas          |
| Dhrs4         | 3.08E-05 | 0.4421   | 0.446 | 0.334 | 0.267283 | repair | Dhrs4         |
| Dbp           | 3.64E-05 | 0.476696 | 0.315 | 0.2   | 0.31538  | repair | Dbp           |
| Park7         | 3.67E-05 | 0.299064 | 0.761 | 0.671 | 0.317764 | repair | Park7         |
| Gng5          | 4.03E-05 | 0.333846 | 0.671 | 0.564 | 0.349131 | repair | Gng5          |
| Map1lc3b      | 4.22E-05 | 0.442801 | 0.375 | 0.252 | 0.366047 | repair | Map1lc3b      |
| Uqcrh         | 4.30E-05 | 0.26085  | 0.77  | 0.69  | 0.37235  | repair | Uqcrh         |
| RP23-306P12-2 | 4.62E-05 | 0.417384 | 0.46  | 0.342 | 0.400547 | repair | RP23-306P12-2 |
| Adhfe1        | 5.79E-05 | 0.443363 | 0.321 | 0.208 | 0.501996 | repair | Adhfe1        |
| D630029K05Rik | 5.97E-05 | 0.578669 | 0.263 | 0.164 | 0.517788 | repair | D630029K05Rik |
| Gatm          | 6.30E-05 | 0.377972 | 0.542 | 0.419 | 0.546    | repair | Gatm          |

|         |          |          |       |       |          |           |         |
|---------|----------|----------|-------|-------|----------|-----------|---------|
| Cat     | 6.37E-05 | 0.367029 | 0.547 | 0.427 | 0.551925 | repa<br>r | Cat     |
| Ndufab1 | 7.01E-05 | 0.303567 | 0.622 | 0.51  | 0.607631 | repa<br>r | Ndufab1 |
| Cryz    | 7.96E-05 | 0.418585 | 0.498 | 0.381 | 0.690243 | repa<br>r | Cryz    |
| Ech1    | 8.74E-05 | 0.419608 | 0.532 | 0.436 | 0.757109 | repa<br>r | Ech1    |
| Qdpr    | 8.83E-05 | 0.395495 | 0.476 | 0.351 | 0.765097 | repa<br>r | Qdpr    |
| Bri3    | 8.90E-05 | 0.380534 | 0.528 | 0.408 | 0.770991 | repa<br>r | Bri3    |
| Lamtor5 | 9.24E-05 | 0.398495 | 0.444 | 0.323 | 0.801113 | repa<br>r | Lamtor5 |
| Camk2n1 | 0.000104 | 0.497372 | 0.338 | 0.236 | 0.89859  | repa<br>r | Camk2n1 |
| Suc1g1  | 0.000108 | 0.342491 | 0.525 | 0.408 | 0.932454 | repa<br>r | Suc1g1  |
| Atp5f1  | 0.000138 | 0.354108 | 0.591 | 0.493 | 1        | repa<br>r | Atp5f1  |
| Slc25a4 | 0.000184 | 0.294555 | 0.403 | 0.288 | 1        | repa<br>r | Slc25a4 |
| Ndufb5  | 0.000188 | 0.319303 | 0.529 | 0.416 | 1        | repa<br>r | Ndufb5  |
| Hebp1   | 0.000219 | 0.497011 | 0.276 | 0.181 | 1        | repa<br>r | Hebp1   |
| Glud1   | 0.000223 | 0.436411 | 0.3   | 0.2   | 1        | repa<br>r | Glud1   |
| Hspd1   | 0.000229 | 0.321768 | 0.383 | 0.268 | 1        | repa<br>r | Hspd1   |
| Grhpr   | 0.000232 | 0.409451 | 0.473 | 0.364 | 1        | repa<br>r | Grhpr   |
| Gclm    | 0.000239 | 0.410516 | 0.427 | 0.321 | 1        | repa<br>r | Gclm    |
| Mrpl54  | 0.000302 | 0.518707 | 0.261 | 0.17  | 1        | repa<br>r | Mrpl54  |
| Eno1    | 0.000366 | 0.361866 | 0.466 | 0.351 | 1        | repa<br>r | Eno1    |
| Txn1    | 0.000374 | 0.264769 | 0.719 | 0.63  | 1        | repa<br>r | Txn1    |
| Stard10 | 0.000376 | 0.271087 | 0.42  | 0.312 | 1        | repa<br>r | Stard10 |
| Cmpk1   | 0.000399 | 0.347426 | 0.311 | 0.211 | 1        | repa<br>r | Cmpk1   |



|         |              |              |           |           |   |           |         |
|---------|--------------|--------------|-----------|-----------|---|-----------|---------|
| Polr3e  | 0.0004<br>25 | 0.52960<br>4 | 0.2<br>56 | 0.1<br>73 | 1 | repa<br>r | Polr3e  |
| Pdpf    | 0.0004<br>31 | 0.54371      | 0.2<br>84 | 0.1<br>89 | 1 | repa<br>r | Pdpf    |
| Dnajc12 | 0.0004<br>37 | 0.34753<br>6 | 0.5<br>03 | 0.4<br>05 | 1 | repa<br>r | Dnajc12 |
| Hsbp1   | 0.0004<br>57 | 0.34184<br>8 | 0.3<br>99 | 0.2<br>96 | 1 | repa<br>r | Hsbp1   |
| Mrps14  | 0.0004<br>58 | 0.46568<br>1 | 0.2<br>72 | 0.1<br>78 | 1 | repa<br>r | Mrps14  |
| Rnf181  | 0.0004<br>6  | 0.29349<br>8 | 0.4<br>7  | 0.3<br>64 | 1 | repa<br>r | Rnf181  |
| Timm13  | 0.0005<br>38 | 0.26981<br>4 | 0.5<br>64 | 0.4<br>47 | 1 | repa<br>r | Timm13  |
| Calm3   | 0.0005<br>38 | 0.38432      | 0.4<br>58 | 0.3<br>45 | 1 | repa<br>r | Calm3   |
| Gcsh    | 0.0005<br>59 | 0.43615<br>2 | 0.3       | 0.2<br>11 | 1 | repa<br>r | Gcsh    |
| Pdha1   | 0.0005<br>86 | 0.48105<br>3 | 0.3<br>15 | 0.2<br>25 | 1 | repa<br>r | Pdha1   |
| Cotl1   | 0.0006<br>31 | 0.43584<br>1 | 0.2<br>63 | 0.1<br>78 | 1 | repa<br>r | Cotl1   |
| Mpc2    | 0.0006<br>4  | 0.29824<br>3 | 0.6<br>87 | 0.6<br>16 | 1 | repa<br>r | Mpc2    |
| Gng12   | 0.0007<br>27 | 0.35999      | 0.2<br>97 | 0.2       | 1 | repa<br>r | Gng12   |
| Myeov2  | 0.0007<br>75 | 0.30730<br>5 | 0.5<br>4  | 0.4<br>44 | 1 | repa<br>r | Myeov2  |
| S100a10 | 0.0008<br>02 | 0.27768<br>9 | 0.2<br>64 | 0.1<br>75 | 1 | repa<br>r | S100a10 |
| Mrps21  | 0.0008<br>6  | 0.32837<br>6 | 0.5<br>9  | 0.5<br>01 | 1 | repa<br>r | Mrps21  |
| Coq9    | 0.0009<br>02 | 0.37046<br>1 | 0.2<br>74 | 0.1<br>86 | 1 | repa<br>r | Coq9    |
| Acads   | 0.0009<br>08 | 0.42103      | 0.3<br>22 | 0.2<br>3  | 1 | repa<br>r | Acads   |
| Mrpl50  | 0.0009<br>19 | 0.41871<br>1 | 0.2<br>59 | 0.1<br>75 | 1 | repa<br>r | Mrpl50  |
| Timm17a | 0.0009<br>49 | 0.37890<br>8 | 0.2<br>77 | 0.1<br>84 | 1 | repa<br>r | Timm17a |
| Snx3    | 0.0010<br>27 | 0.28926<br>2 | 0.3<br>11 | 0.2<br>16 | 1 | repa<br>r | Snx3    |
| Gipc2   | 0.0010<br>48 | 0.28533<br>7 | 0.2<br>83 | 0.1<br>95 | 1 | repa<br>r | Gipc2   |

|               |          |          |       |       |   |          |               |
|---------------|----------|----------|-------|-------|---|----------|---------------|
| Fkbp1a        | 0.001192 | 0.286895 | 0.32  | 0.225 | 1 | repaired | Fkbp1a        |
| Ndufs7        | 0.001363 | 0.290282 | 0.52  | 0.419 | 1 | repaired | Ndufs7        |
| Grpel1        | 0.001411 | 0.458431 | 0.267 | 0.189 | 1 | repaired | Grpel1        |
| Hdgf          | 0.00162  | 0.322237 | 0.283 | 0.195 | 1 | repaired | Hdgf          |
| Tpd52         | 0.00214  | 0.35281  | 0.252 | 0.17  | 1 | repaired | Tpd52         |
| Tomm5         | 0.002275 | 0.417959 | 0.293 | 0.214 | 1 | repaired | Tomm5         |
| Pter          | 0.002352 | 0.309025 | 0.433 | 0.345 | 1 | repaired | Pter          |
| S100a11       | 0.002379 | 0.266676 | 0.353 | 0.26  | 1 | repaired | S100a11       |
| Serp1         | 0.002585 | 0.332233 | 0.27  | 0.192 | 1 | repaired | Serp1         |
| Ddah1         | 0.002806 | 0.282444 | 0.367 | 0.277 | 1 | repaired | Ddah1         |
| Etfb          | 0.002953 | 0.284153 | 0.68  | 0.611 | 1 | repaired | Etfb          |
| Taldo1        | 0.003532 | 0.325016 | 0.314 | 0.236 | 1 | repaired | Taldo1        |
| Hadh          | 0.003533 | 0.269535 | 0.508 | 0.419 | 1 | repaired | Hadh          |
| Mrpl30        | 0.003837 | 0.316071 | 0.291 | 0.211 | 1 | repaired | Mrpl30        |
| Ndufs3        | 0.003989 | 0.252901 | 0.364 | 0.271 | 1 | repaired | Ndufs3        |
| Swi5          | 0.004011 | 0.289304 | 0.412 | 0.321 | 1 | repaired | Swi5          |
| Dynlrb1       | 0.004343 | 0.388003 | 0.294 | 0.219 | 1 | repaired | Dynlrb1       |
| Lypla1        | 0.004654 | 0.313095 | 0.419 | 0.345 | 1 | repaired | Lypla1        |
| Pbld2         | 0.004838 | 0.338243 | 0.257 | 0.184 | 1 | repaired | Pbld2         |
| Mcee          | 0.00562  | 0.347787 | 0.271 | 0.197 | 1 | repaired | Mcee          |
| 1110008F13Rik | 0.005825 | 0.389334 | 0.271 | 0.203 | 1 | repaired | 1110008F13Rik |
| Erich4        | 0.005977 | 0.36976  | 0.311 | 0.236 | 1 | repaired | Erich4        |

|                   |              |              |           |           |   |           |                   |
|-------------------|--------------|--------------|-----------|-----------|---|-----------|-------------------|
| Dnaja1            | 0.0077<br>13 | 0.29389<br>5 | 0.3<br>27 | 0.2<br>52 | 1 | repa<br>r | Dnaja1            |
| Ankrd13c          | 0.0078<br>56 | 0.25511<br>3 | 0.3<br>15 | 0.2<br>41 | 1 | repa<br>r | Ankrd13c          |
| 1810058l24<br>Rik | 0.0084<br>34 | 0.25259<br>9 | 0.4<br>07 | 0.3<br>21 | 1 | repa<br>r | 1810058l24<br>Rik |
| Ndufa10           | 0.0084<br>87 | 0.32435<br>3 | 0.3<br>54 | 0.2<br>82 | 1 | repa<br>r | Ndufa10           |
| Aldh9a1           | 0.0094<br>53 | 0.26221<br>1 | 0.2<br>8  | 0.2<br>11 | 1 | repa<br>r | Aldh9a1           |

Supplementary Table S2 The differentially expressed genes analysis results between repaired and atrophy PT cells of GSE161758.

| PCR primers for qRT-PCR |                             |
|-------------------------|-----------------------------|
| Genes                   | PCR primers                 |
| Cd74 F                  | 5'-AGTGCACGAGAACGGTAAC -3'  |
| Cd74 R                  | 5'-CGTTGGGGAACACACACCA -3'  |
| mouse actin- F          | 5'-AACAGTCCGCCTAGAAGCAC -3' |
| mouse actin -R          | 5'-CGTTGACATCCGTAAAGACC -3' |
| App F                   | 5'-AGGACTGACCACTCGACCAG -3' |
| App R                   | 5'-CGGGGGTCTAGTTCTGCAT -3'  |

Supplementary Table S3 The primer sequences used in PCR of this research

| Cell type    | Macro | LOH-DL  | LOH-AL  | PT      | CD-IC    | DCT     | Endo   | CD-PC   | Pod   | Act-Fib1 | Act-Fib2 | URO   | T cell |
|--------------|-------|---------|---------|---------|----------|---------|--------|---------|-------|----------|----------|-------|--------|
| Marker genes |       |         |         |         |          |         |        |         |       |          |          |       |        |
|              | Ctss  | Slc12a1 | Slc12a1 | SLC27A2 | Slc26a4  | Slc12a3 | Emcn   | Tmem45b | Nphs1 | Pdgfrb   | Pdgfrb   | Upk1b | Cd247  |
|              | Itgam | Umod    | Umod    | Lrp2    | Atp6v1g3 |         | Ednrb  | Aqp2    | Nphs2 | Dcn      | Dcn      |       | Cd3e   |
|              | C1qc  | Epha7   |         | Miox    | Kit      |         | Ehd3   | Hsd11b2 | Podxl | Cfh      | Cfh      |       | Cd8a   |
|              | C1qb  | Bst1    |         | Slc4a4  | Slc4a1   |         | Igfbp3 | Fxyd4   |       | Tnc      | Tnc      |       | Trbc2  |
|              | C1QA  |         |         |         | Aqp6     |         | Plat   | Aqp3    |       | Spon1    | Spon1    |       | Thy1   |
|              | Lyz2  |         |         |         |          |         | Tek    | TRPV5   |       | Bmpr1b   | Bmpr1b   |       |        |
|              |       |         |         |         |          |         |        |         |       | Vcan     |          |       |        |

Supplementary Table S4 The cell markers used in the cell type identification.
